# Supplementary material for: Undergraduate Nursing Students’ Satisfaction with blended e-learning following the Covid-19 pandemic
Source: Research Square preprint supplement (doi:10.21203/rs.3.rs-119868/v1), 2020-12-16
Supplement: Supplementary file 1 [file 2a76864fb7dba8ce54708566.docx]

| **Domains of enquiry** | **Comparison of Nurse and CIT mean domain scores and associated p-value** | | | **Cronbach α**  **Nurse**  **(CIT)** | **95% confidence bounds for Cronbach α reliability** | |
| --- | --- | --- | --- | --- | --- | --- |
| Nurse mean (SD) | CIT mean (SD) | p-value | **Lower**  **Nurse/(CIT)** | **Upper**  **Nurse/(CIT)** |
| Interaction (9 items) | 3.54 (1.10) | 3.10 (1.24) | **<0.001** | 0.682 (0.750) | 0.617  (0.650) | 0.725  (0.800) |
| Instruction (12 items) | 3.49 (1.18) | 3.00 (1.23) | **<0.001** | 0.864 (0.840) | 0.834  (0.770) | 0.886  (0.914) |
| Instructor (5 items) | 3.54 (1.12) | 3.80 (1.23) | **0.030** | 0.720 (0.700) | 0.656  (0.590) | 0.763  (0.780) |
| Management (3 items) | 3.65 (1.11) | 3.60 (1.35) | 0.717 | 0.534 (0.570) | 0.415  (0.400) | 0.633  (0.694) |
| Technology (6 items) | 3.75 (1.07) | 3.70 (1.18) | 0.677 | 0.772 (0.800) | 0.724  (0.710) | 0.809  (0.840) |
| All domains (35 items) | 3.37 (1.24) | 3.31 (1.23) | 0.667 | 0.906 | 0.888 | 0.918 |
