# Supplementary material for: Undergraduate Nursing Students’ Satisfaction with blended e-learning following the Covid-19 pandemic
Source: Research Square preprint supplement (doi:10.21203/rs.3.rs-119868/v1), 2020-12-16
Supplement: Supplementary file 2 [file 67c6a8f3c2f27505ad0901b8.docx]

| Domain | Undergraduate year of study | | | Inter-year comparisons of mean scores | | |
| --- | --- | --- | --- | --- | --- | --- |
| Year 2 N=90 mean (SD) | Year 3 N=103 mean (SD) | Year 4 N=90 mean (SD) | Years 2 & 3 p-value | Years 2 & 4 p-value | Years 3 & 4 p-value |
| Interaction | 3.56 (1.12) | 3.48 (1.05) | 3.58 (1.14) | 0.174 | 0.660 | 0.069 |
| Instruction | 3.40 (1.25) | 3.44 (1.14) | 3.65 (1.13) | 0.370 | **<**0.001 | **<**0.001 |
| Instructor | 3.42 (1.20) | 3.52 (1.10) | 3.69 (1.04) | 0.189 | **<**0.001 | 0.015 |
| Management | 3.64 (1.13) | 3.63 (1.10) | 3.68 (1.11) | 0.889 | 0.672 | 0.560 |
| Technology | 3.67 (1.07) | 3.67 (1.04) | 3.92 (1.07) | 0.905 | < 0.001 | **<** 0.001 |
