# Supplementary material for: Undergraduate Nursing Students’ Satisfaction with blended e-learning following the Covid-19 pandemic
Source: Research Square preprint supplement (doi:10.21203/rs.3.rs-119868/v1), 2020-12-16
Supplement: Supplementary file 3 [file c3e74e588b0d5e0178162351.docx]

|  | **Nurse**  **sample (n=283)** | **CIT 2012 (n=108)** |  | **Nurse Male**  **(n=84)** | **Nurse Female (n=199)** | **Male/female**  **Nurse**  **comparison** |
| --- | --- | --- | --- | --- | --- | --- |
| **Questions** | **Mean (SD)** | **Mean**  **(SD)** |  | **Mean (SD)** | **Mean (SD)** | **p-value** |
| **Interaction Domain (S1-S9)** |  |  |  |  |  |  |
| S1. A blended learning session keeps me always alert and focused. | 3.43 (1.08) | 2.60*** (1.25) |  | 3.55 (1.07) | 3.38 (1.08) | 0.236 |
| S2. Interaction is adequately maintained with the lecturer when he/she is on the other side of the blended learning classroom. | 3.63 (1.02) | 3.00*** (1.27) |  | 3.67 (1.08) | 3.62 (1.00) | 0.724 |
| S3. Having students from the opposite gender on the other side of the blended learning classroom listening to what I say might restrict my participation. | 3.21 (1.23) | 3.45 (1.35) |  | 3.27 (1.26) | 3.18 (1.22) | 0.568 |
| S4. A blended learning course makes it more important for students to visit the lecturer during office-hours. | 3.30 (1.08) | 3.45 (1.26) |  | 3.11 (1.05) | 3.30 (1.10) | 0.954 |
| S5. I cannot interrupt the lecturer to ask a question when he/she is on the other side of the blended learning classroom. | 3.55 (1.16) | 3.30 (1.52) |  | 3.80 (1.17) | 3.45** (1.15) | 0.021 |
| S6. I am satisfied with the quality of interaction between all involved parties. | 3.68 (1.00) | 3.10*** (1.17) |  | 3.61 (1.12) | 3.71 (0.94) | 0.466 |
| S7. I am dissatisfied with the process of collaboration activities during the course. | 3.33 (1.15) | 3.40 (1.31) |  | 3.42 (1.19) | 3.29 (1.13) | 0.395 |
| S8. I am satisfied with the way I interact with other students. | 3.77 (0.99) | 3.60 (1.13) |  | 3.69 (1.09) | 3.81 (0.95) | 0.385 |
| S9. I am satisfied with my participation in the class. | 3.93 (0.96) | 3.35*** (1.28) |  | 4.05 (0.94) | 3.88 (0.96) | 0.186 |
| **Instruction Domain (S10-S21)** |  |  |  |  |  |  |
| S10. Use of blended learning technology in this course encourages me to learn independently. | 3.77 (1.12) | 3.15*** (1.16) |  | 3.80 (1.19) | 3.75 (1.09) | 0.772 |
| S11. My understanding is improved compared to similar courses I studied before | 2.89 (1.27) | 2.70 (1.14) |  | 2.93 (1.27) | 2.87 (1.28) | 0.743 |
| S12. My performance in exams is improved compared to similar courses I studied before | 3.49 (1.22) | 2.75*** (1.18) |  | 3.65 (1.21) | 3.43 (1.22) | 0.149 |
| S13. I am satisfied with the level of effort this course required. | 3.62 (1.06) | 3.20** (1.15) |  | 3.79 (1.07) | 3.55 (1.06) | 0.085 |
| S14. I am dissatisfied with my performance in this course. | 3.34 (1.20) | 3.00* (1.31) |  | 3.42 (1.33) | 3.31 (1.14) | 0.507 |
| S15. I believe I will be satisfied with my final grade in the course. | 3.59 (1.05) | 3.40 (1.08) |  | 3.74 (1.12) | 3.53 (1.02) | 0.138 |
| S16. I am satisfied with how I am able to apply what I have learned in this course. | 3.45 (1.04) | 3.40 (1.18) |  | 3.37 (1.21) | 3.48 (0.97) | 0.467 |
| S17. Had I known this was a blended learning class, I would not have taken it. | 3.91 (1.07) | 3.00*** (1.33) |  | 3.82 (1.18) | 3.95 (1.02) | 0.386 |
| S18. I am willing to take another course using the blended learning delivery mode | 3.80 (1.02) | 2.55*** (1.29) |  | 3.86 (1.04) | 3.78 (1.01) | 0.561 |
| S19. I am satisfied enough with this course to recommend it to others. | 3.62 (1.11) | 2.90***  (1.26) |  | 3.71 (1.20) | 3.58 (1.07) | 0.385 |
| S20. Compared to face-to-face course settings, I am less satisfied with this learning experience. | 2.65 (1.23) | 2.50 (1.37) |  | 3.01 (1.28) | 2.50** (1.18) | 0.002 |
| S21. I enjoy working on assignments by myself. | 3.76 (1.01) | 3.55 (1.29) |  | 3.75 (1.11) | 3.77 (0.96) | 0.892 |
| **Instructor Domain (S22-S26)** |  |  |  |  |  |  |
| S22. The instructor makes me feel that I am a true member of the class | 3.61 (1.01) | 3.70 (1.29) |  | 3.54 (1.10) | 3.64 (0.97) | 0.438 |
| S23. I am dissatisfied with the accessibility and availability of the instructor | 3.31 (1.17) | 3.00* (1.36) |  | 3.36 (1.20) | 3.30 (1.16) | 0.694 |
| S24. The instructor uses blended learning technology appropriately**.** | 3.89 (0.95) | 4.00 (0.94) |  | 4.12 (0.94) | 3.80**  (0.94) | 0.009 |
| S25. Class assignments were clearly communicated to me. | 3.60 (1.16) | 3.70 (1.22) |  | 3.46 (1.24) | 3.66 (1.12) | 0.204 |
| S26. Feedback on evaluation of tests and other assignments was given in a timely manner | 3.30 (1.20) | 3.70** (1.27) |  | 3.54 (1.20) | 3.20* (1.19) | 0.031 |
| **Management Domain (S27-S29)** |  |  |  |  |  |  |
| S27. Discipline is highly observed when the lecturer is on the other side of the blended learning | 3.78 (1.01) | 2.95*** (1.32) |  | 3.82 (1.04) | 3.77 (1.00) | 0.695 |
| S28. The lecturer/supervisor always takes attendance. | 3.54 (1.02) | 4.00** (1.39) |  | 3.55 (1.09) | 3.54 (0.99) | 0.943 |
| S29. I attend discussion board classes the same way I attend face-to-face classes | 3.62 (1.27) | 3.85 (1.39) |  | 3.46 (1.32) | 3.69 (1.25) | 0.185 |
| **Technology Domain (S30-S35)** |  |  |  |  |  |  |
| S30. The instructor’s voice is audible. | 3.66 (1.04) | 3.75 (1.28) |  | 3.93 (0.93) | 3.55** (1.07) | 0.003 |
| S31. Course content shown or displayed on the smart board is clear. | 4.10 (0.86) | 4.50*** (0.80) |  | 4.10 (0.94) | 4.10 (0.83) | 0.998 |
| S32. The microphone is in good working condition. | 3.78 (1.06) | 3.60 (1.31) |  | 4.14 (0.89) | 3.62*** (1.09) | **<**0.001 |
| S33. The image is clear and comprehensive when the lecturer is on the other side of the blended learning classroom. | 3.94 (0.90) | 3.90 (1.27) |  | 4.04 (0.86) | 3.89 (0.92) | 0.215 |
| S34. Technical problems are not frequent and they do not adversely affect my understanding of the course. | 3.13 (1.30) | 3.65*** (1.21) |  | 3.54 (1.19) | 2.97*** (1.31) | **<**0.001 |
| S35. The technology used for blended teaching is reliable | 3.88 (0.91) | 3.60* (1.11) |  | 4.00 (0.93) | 3.83 (0.90) | 0.167 |
